# Supplementary material for: Poly(N,N-dimethyl)acrylamide-based ion-conductive gel with transparency, self-adhesion and rapid self-healing properties for human motion detection
Source: Royal Society of Chemistry journal article supplement (doi:10.1039/d2sm00786j), 2022-01-01
Supplement: d2sm00786j5.pdf [file d2sm00786j5.pdf]

## Supporting Information

### **Poly(*N,N*-dimethyl)acrylamide-based Ion-conductive Gel with Transparency, Self-adhesion and Rapid Self-healing Properties for Human Motion Detection**

Ling Wang, Shengjie Liu, Jingjing Cheng, Yao Peng, Fangfei Meng, Zhaoqiang Wu\*,  
and Hong Chen

Key Laboratory of Polymeric Materials Design and Synthesis for Biomedical Function,  
College of Chemistry, Chemical Engineering and Materials Science, Soochow  
University, Suzhou 215123, P. R. China

\*Corresponding author: E-mail: wzqwhu@suda.edu.cn (Q.Z. Wu); Tel: +86-512-  
65884279, Fax: +86-512-65880567

## Supplementary Results

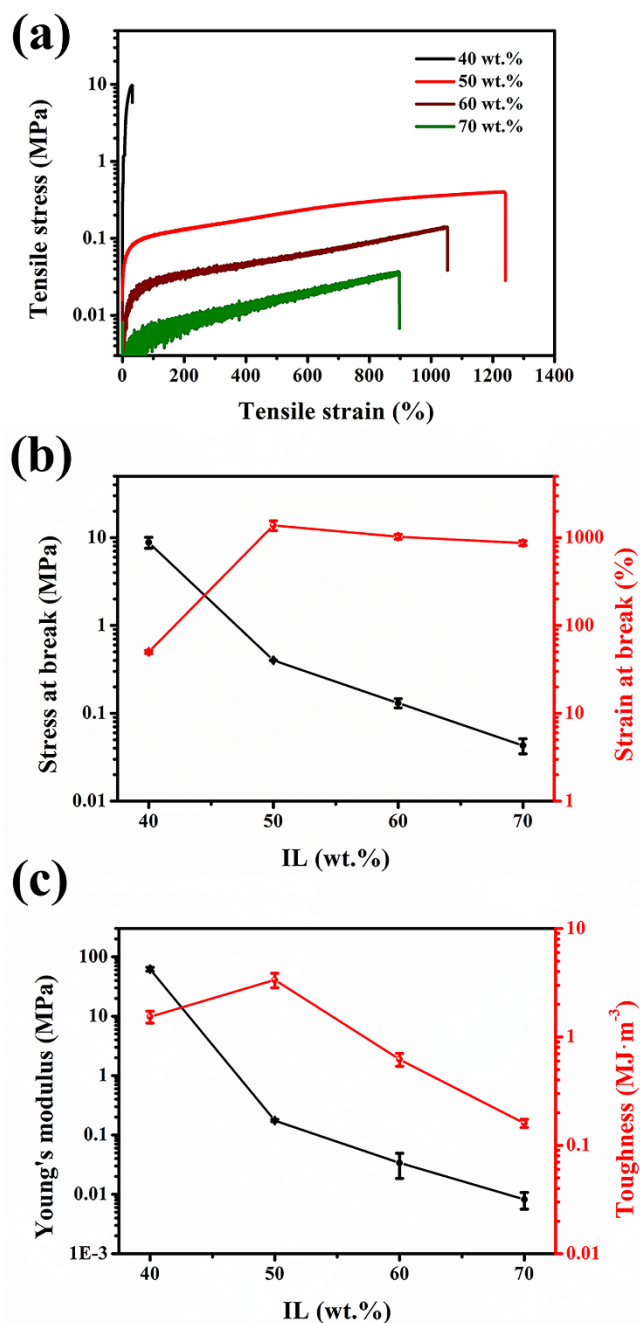

Fig. S1 (a) Tensile testing stress-strain curves, (b) stress at break and strain at break, (c) Young's modulus and toughness of the PDMA ion-conductive gels with various [BMIM][Tf<sub>2</sub>N] contents. Error bars represent the standard deviation (n = 3).

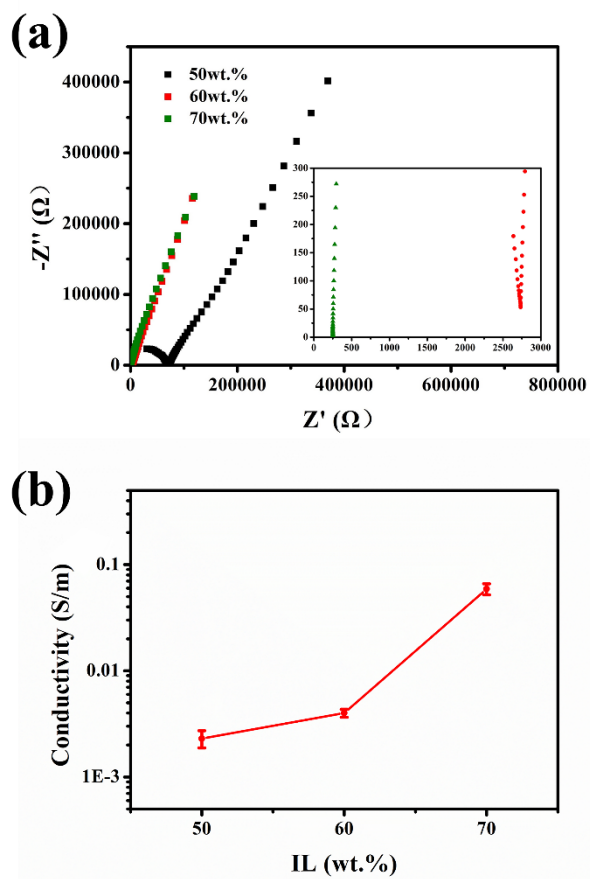

Fig. S2 (a) Nyquist plots of impedance spectra and (b) electrical conductivity of the ion-conductive gels with different [BMIM][Tf<sub>2</sub>N] contents. Error bars represent the standard deviation ( $n = 3$ ).

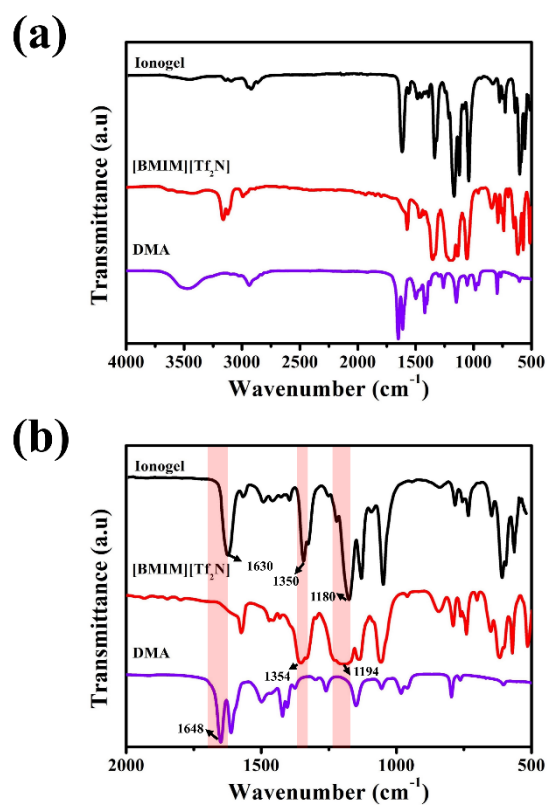

Fig. S3 FTIR spectra of DMA, [BMIM][Tf<sub>2</sub>N] and ion-conductive gel. (a) Full spectra and (b) expanded spectra.

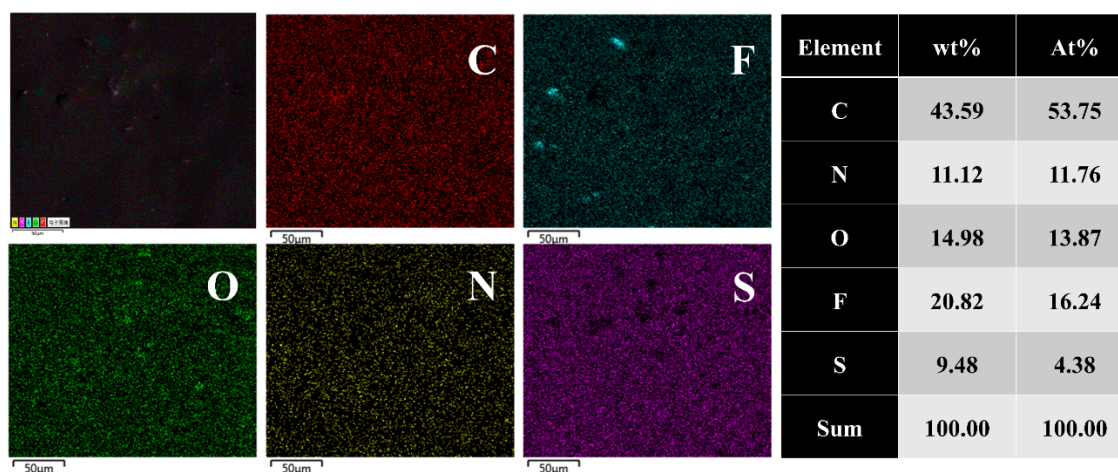

Fig. S4 EDS image and data of the ion-conductive gel.

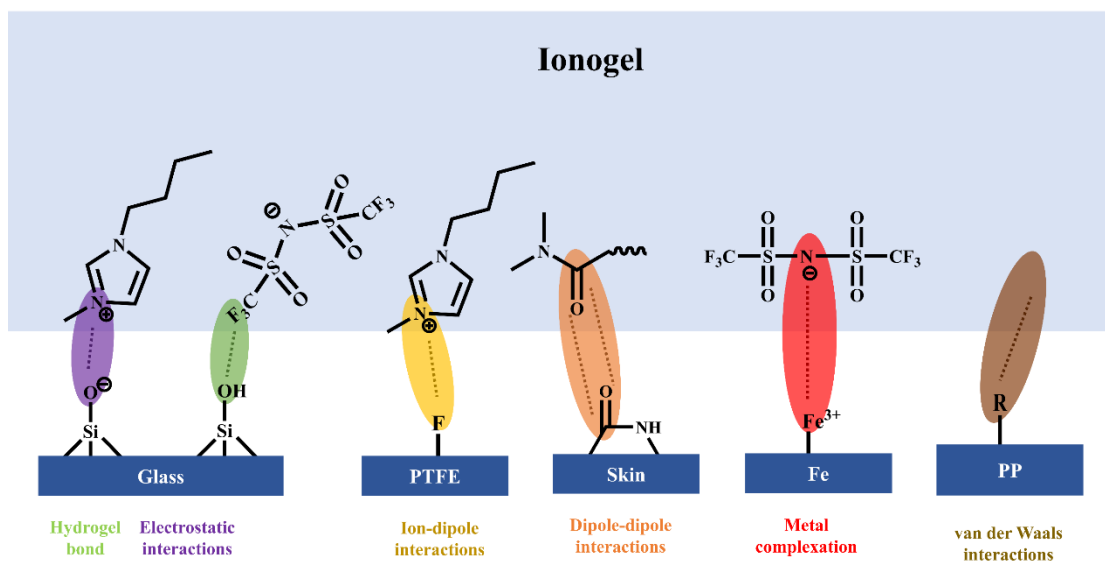

Fig. S5 Possible adhesion mechanism of ion-conductive gels on different substrate surfaces.
